# Supplementary material
Source: publisher figshare collection journal article supplement (https://acs.figshare.com/ndownloader/files/3615909)
Supplement: Supplementary file 1 [file 3615909]

 
data_GZ-zh 
 
_audit_creation_method            SHELXL-97 
_chemical_name_systematic 
; 
 ? 
; 
_chemical_name_common             ? 
_chemical_melting_point           ? 
_chemical_formula_moiety          ? 
_chemical_formula_sum 
 'C22 H19 Br O2 Se' 
_chemical_formula_weight          474.24 
 
loop_ 
 _atom_type_symbol 
 _atom_type_description 
 _atom_type_scat_dispersion_real 
 _atom_type_scat_dispersion_imag 
 _atom_type_scat_source 
 'C'  'C'   0.0033   0.0016 
 'International Tables Vol C Tables 4.2.6.8 and 6.1.1.4' 
 'H'  'H'   0.0000   0.0000 
 'International Tables Vol C Tables 4.2.6.8 and 6.1.1.4' 
 'Br'  'Br'  -0.2901   2.4595 
 'International Tables Vol C Tables 4.2.6.8 and 6.1.1.4' 
 'O'  'O'   0.0106   0.0060 
 'International Tables Vol C Tables 4.2.6.8 and 6.1.1.4' 
 'Se'  'Se'  -0.0929   2.2259 
 'International Tables Vol C Tables 4.2.6.8 and 6.1.1.4' 
 
_symmetry_cell_setting            orthorhombic
_symmetry_space_group_name_H-M    P212121 
_symmetry_space_group_name_Hall   P2ac2ab
 
loop_ 
 _symmetry_equiv_pos_as_xyz 
 'x, y, z' 
 '-x+1/2, -y, z+1/2' 
 '-x, y+1/2, -z+1/2' 
 'x+1/2, -y+1/2, -z' 
 
_cell_length_a                    5.7402(4) 
_cell_length_b                    14.3570(10) 
_cell_length_c                    22.6404(17) 
_cell_angle_alpha                 90.00 
_cell_angle_beta                  90.00 
_cell_angle_gamma                 90.00 
_cell_volume                      1865.8(2) 
_cell_formula_units_Z             4 
_cell_measurement_temperature     100(2) 
_cell_measurement_reflns_used     9907 
_cell_measurement_theta_min       2.88 
_cell_measurement_theta_max       27.1 
 
_exptl_crystal_description        needle
_exptl_crystal_colour             colorless 
_exptl_crystal_size_max           0.22 
_exptl_crystal_size_mid           0.08 
_exptl_crystal_size_min           0.05 
_exptl_crystal_density_meas       ? 
_exptl_crystal_density_diffrn     1.688 
_exptl_crystal_density_method     'not measured' 
_exptl_crystal_F_000              944 
_exptl_absorpt_coefficient_mu     4.168 
_exptl_absorpt_correction_type    multi-scan
_exptl_absorpt_correction_T_min   0.4608 
_exptl_absorpt_correction_T_max   0.8187 
_exptl_absorpt_process_details    SADABS 
 
_exptl_special_details 
; 
 ? 
; 
 
_diffrn_ambient_temperature       100(2) 
_diffrn_radiation_wavelength      0.71073 
_diffrn_radiation_type            MoK\a 
_diffrn_radiation_source          'fine-focus sealed tube' 
_diffrn_radiation_monochromator   graphite 
_diffrn_measurement_device_type   
;
Bruker D8 goniometer with CCD area detector  
; 
_diffrn_measurement_method        'omega and phi scans'   
_diffrn_detector_area_resol_mean  ? 
_diffrn_reflns_number             29782 
_diffrn_reflns_av_R_equivalents   0.0403 
_diffrn_reflns_av_sigmaI/netI     0.0238 
_diffrn_reflns_limit_h_min        -7 
_diffrn_reflns_limit_h_max        7 
_diffrn_reflns_limit_k_min        -18 
_diffrn_reflns_limit_k_max        18 
_diffrn_reflns_limit_l_min        -29 
_diffrn_reflns_limit_l_max        28 
_diffrn_reflns_theta_min          1.68 
_diffrn_reflns_theta_max          27.16 
_reflns_number_total              4139 
_reflns_number_gt                 3897 
_reflns_threshold_expression      >2sigma(I) 
 
_computing_data_collection        'APEX2 v2009.3.0 (Bruker-AXS, 2009)' 
_computing_cell_refinement        'SAINT 7.46A (Bruker-AXS, 2009)' 
_computing_data_reduction         'SAINT 7.46A (Bruker-AXS, 2009)' 
_computing_structure_solution     'SHELXS-97 (Sheldrick, 2008)' 
_computing_structure_refinement   'SHELXL-97 (Sheldrick, 2008)' 
_computing_molecular_graphics     'Bruker SHELXTL (Sheldrick, 2008)' 
_computing_publication_material   'Bruker SHELXTL (Sheldrick, 2008)'
 
_refine_special_details 
; 
 Refinement of F^2^ against ALL reflections.  The weighted R-factor wR and 
 goodness of fit S are based on F^2^, conventional R-factors R are based 
 on F, with F set to zero for negative F^2^. The threshold expression of 
 F^2^ > 2sigma(F^2^) is used only for calculating R-factors(gt) etc. and is 
 not relevant to the choice of reflections for refinement.  R-factors based 
 on F^2^ are statistically about twice as large as those based on F, and R- 
 factors based on ALL data will be even larger. 
; 
 
_refine_ls_structure_factor_coef  Fsqd  
_refine_ls_matrix_type            full 
_refine_ls_weighting_scheme       calc  
_refine_ls_weighting_details 
 'calc w=1/[\s^2^(Fo^2^)+(0.0201P)^2^+0.6269P] where P=(Fo^2^+2Fc^2^)/3' 
_atom_sites_solution_primary      direct 
_atom_sites_solution_secondary    difmap 
_atom_sites_solution_hydrogens    geom 
_refine_ls_hydrogen_treatment     constr 
_refine_ls_extinction_method      none 
_refine_ls_extinction_coef        ? 
_refine_ls_abs_structure_details 
 'Flack H D (1983), Acta Cryst. A39, 876-881' 
_refine_ls_abs_structure_Flack    -0.006(6) 
_chemical_absolute_configuration  ad
_refine_ls_number_reflns          4139 
_refine_ls_number_parameters      236 
_refine_ls_number_restraints      0 
_refine_ls_R_factor_all           0.0240 
_refine_ls_R_factor_gt            0.0205 
_refine_ls_wR_factor_ref          0.0444 
_refine_ls_wR_factor_gt           0.0435 
_refine_ls_goodness_of_fit_ref    1.047 
_refine_ls_restrained_S_all       1.047 
_refine_ls_shift/su_max           0.002 
_refine_ls_shift/su_mean          0.000 
 
loop_ 
 _atom_site_label 
 _atom_site_type_symbol 
 _atom_site_fract_x 
 _atom_site_fract_y 
 _atom_site_fract_z 
 _atom_site_U_iso_or_equiv 
 _atom_site_adp_type 
 _atom_site_occupancy 
 _atom_site_symmetry_multiplicity 
 _atom_site_calc_flag 
 _atom_site_refinement_flags 
 _atom_site_disorder_assembly 
 _atom_site_disorder_group 
C1 C 0.3911(4) 0.46597(14) 0.47969(9) 0.0157(4) Uani 1 1 d . . . 
H1 H 0.2569 0.4503 0.5060 0.019 Uiso 1 1 calc R . . 
C2 C 0.4844(3) 0.56195(13) 0.49640(9) 0.0154(4) Uani 1 1 d . . . 
H2 H 0.6166 0.5789 0.4697 0.018 Uiso 1 1 calc R . . 
C3 C 0.5678(4) 0.56116(15) 0.56019(10) 0.0195(5) Uani 1 1 d . . . 
H3A H 0.6539 0.6194 0.5686 0.023 Uiso 1 1 calc R . . 
H3B H 0.4315 0.5585 0.5869 0.023 Uiso 1 1 calc R . . 
C4 C 0.7238(4) 0.47886(14) 0.57188(9) 0.0174(4) Uani 1 1 d . . . 
C5 C 0.8832(4) 0.47830(16) 0.61814(10) 0.0212(5) Uani 1 1 d . . . 
H5 H 0.8967 0.5318 0.6426 0.025 Uiso 1 1 calc R . . 
C6 C 1.0227(4) 0.40147(17) 0.62942(11) 0.0263(6) Uani 1 1 d . . . 
H6 H 1.1305 0.4024 0.6613 0.032 Uiso 1 1 calc R . . 
C7 C 1.0036(4) 0.32345(17) 0.59392(11) 0.0262(6) Uani 1 1 d . . . 
H7 H 1.0965 0.2702 0.6019 0.031 Uiso 1 1 calc R . . 
C8 C 0.8499(4) 0.32252(15) 0.54673(10) 0.0206(5) Uani 1 1 d . . . 
H8 H 0.8389 0.2693 0.5219 0.025 Uiso 1 1 calc R . . 
C9 C 0.7116(4) 0.40050(14) 0.53609(9) 0.0169(5) Uani 1 1 d . . . 
C10 C 0.3161(4) 0.45545(14) 0.41620(9) 0.0143(4) Uani 1 1 d . . . 
C11 C 0.4679(4) 0.48018(16) 0.37062(10) 0.0181(5) Uani 1 1 d . . . 
H11 H 0.6173 0.5044 0.3801 0.022 Uiso 1 1 calc R . . 
C12 C 0.4054(4) 0.47009(15) 0.31230(10) 0.0197(5) Uani 1 1 d . . . 
H12 H 0.5093 0.4878 0.2816 0.024 Uiso 1 1 calc R . . 
C13 C 0.1890(4) 0.43379(15) 0.29918(9) 0.0171(5) Uani 1 1 d . . . 
C14 C 0.0353(4) 0.40706(15) 0.34286(10) 0.0184(5) Uani 1 1 d . . . 
H14 H -0.1123 0.3814 0.3330 0.022 Uiso 1 1 calc R . . 
C15 C 0.1008(4) 0.41846(15) 0.40161(9) 0.0175(4) Uani 1 1 d . . . 
H15 H -0.0036 0.4006 0.4321 0.021 Uiso 1 1 calc R . . 
C16 C 0.2168(4) 0.67960(13) 0.40885(9) 0.0152(4) Uani 1 1 d . . . 
C17 C 0.3917(4) 0.72315(14) 0.37634(10) 0.0182(5) Uani 1 1 d . . . 
H17 H 0.5290 0.7443 0.3955 0.022 Uiso 1 1 calc R . . 
C18 C 0.3653(4) 0.73563(15) 0.31599(10) 0.0182(5) Uani 1 1 d . . . 
H18 H 0.4849 0.7653 0.2940 0.022 Uiso 1 1 calc R . . 
C19 C 0.1655(4) 0.70501(14) 0.28761(10) 0.0166(5) Uani 1 1 d . . . 
C20 C -0.0112(4) 0.66375(15) 0.32022(10) 0.0190(5) Uani 1 1 d . . . 
H20 H -0.1510 0.6444 0.3014 0.023 Uiso 1 1 calc R . . 
C21 C 0.0173(4) 0.65098(16) 0.38026(10) 0.0187(5) Uani 1 1 d . . . 
H21 H -0.1032 0.6219 0.4023 0.022 Uiso 1 1 calc R . . 
C22 C -0.0476(4) 0.68729(16) 0.19795(10) 0.0245(5) Uani 1 1 d . . . 
H22A H -0.1833 0.7223 0.2120 0.037 Uiso 1 1 calc R . . 
H22B H -0.0704 0.6208 0.2060 0.037 Uiso 1 1 calc R . . 
H22C H -0.0292 0.6969 0.1554 0.037 Uiso 1 1 calc R . . 
O1 O 0.5719(3) 0.39579(9) 0.48691(7) 0.0202(3) Uani 1 1 d . . . 
O2 O 0.1573(3) 0.71928(10) 0.22801(7) 0.0214(4) Uani 1 1 d . . . 
Se1 Se 0.24181(4) 0.658878(14) 0.492444(9) 0.01887(6) Uani 1 1 d . . . 
Br1 Br 0.10010(4) 0.421181(16) 0.218612(10) 0.02469(6) Uani 1 1 d . . . 
 
loop_ 
 _atom_site_aniso_label 
 _atom_site_aniso_U_11 
 _atom_site_aniso_U_22 
 _atom_site_aniso_U_33 
 _atom_site_aniso_U_23 
 _atom_site_aniso_U_13 
 _atom_site_aniso_U_12 
C1 0.0169(10) 0.0163(10) 0.0140(11) -0.0003(8) 0.0008(9) -0.0002(9) 
C2 0.0175(9) 0.0142(10) 0.0144(11) 0.0003(8) 0.0012(9) 0.0010(8) 
C3 0.0250(12) 0.0170(11) 0.0166(11) -0.0036(8) -0.0044(10) 0.0022(9) 
C4 0.0190(11) 0.0171(10) 0.0162(11) 0.0022(8) 0.0003(10) -0.0006(10) 
C5 0.0247(12) 0.0234(11) 0.0156(11) 0.0013(9) -0.0027(10) -0.0016(10) 
C6 0.0252(13) 0.0319(14) 0.0218(13) 0.0051(10) -0.0070(10) 0.0002(11) 
C7 0.0233(12) 0.0265(13) 0.0289(14) 0.0076(10) -0.0023(10) 0.0049(10) 
C8 0.0249(12) 0.0163(11) 0.0207(12) 0.0015(9) -0.0002(9) 0.0018(9) 
C9 0.0187(11) 0.0185(10) 0.0136(10) 0.0048(8) 0.0015(9) -0.0019(9) 
C10 0.0161(10) 0.0121(9) 0.0146(11) -0.0019(8) -0.0007(8) 0.0009(8) 
C11 0.0137(11) 0.0215(11) 0.0191(12) -0.0022(9) 0.0014(9) -0.0031(9) 
C12 0.0221(11) 0.0199(11) 0.0171(12) -0.0016(9) 0.0061(10) -0.0018(10) 
C13 0.0239(11) 0.0136(10) 0.0139(11) -0.0014(8) -0.0033(8) 0.0027(8) 
C14 0.0163(11) 0.0178(11) 0.0210(12) -0.0035(9) -0.0017(9) -0.0021(9) 
C15 0.0173(10) 0.0170(10) 0.0181(11) -0.0015(9) 0.0034(9) -0.0018(10) 
C16 0.0182(11) 0.0122(10) 0.0152(10) -0.0011(8) 0.0008(9) 0.0041(9) 
C17 0.0137(11) 0.0163(10) 0.0247(12) -0.0035(9) -0.0024(10) -0.0013(10) 
C18 0.0160(11) 0.0166(10) 0.0220(12) 0.0024(9) 0.0043(9) 0.0003(9) 
C19 0.0216(11) 0.0138(10) 0.0145(11) -0.0021(9) 0.0003(9) 0.0061(8) 
C20 0.0178(10) 0.0171(10) 0.0220(12) 0.0001(10) -0.0036(9) 0.0005(9) 
C21 0.0162(10) 0.0177(11) 0.0221(12) 0.0020(10) 0.0011(9) 0.0010(9) 
C22 0.0326(14) 0.0237(12) 0.0171(12) -0.0017(9) -0.0074(10) 0.0023(10) 
O1 0.0269(8) 0.0140(7) 0.0196(8) -0.0030(6) -0.0077(7) 0.0038(6) 
O2 0.0248(8) 0.0233(8) 0.0160(9) 0.0003(6) -0.0008(7) 0.0024(6) 
Se1 0.02462(11) 0.01798(10) 0.01402(10) -0.00080(8) 0.00068(10) 0.00624(10) 
Br1 0.03683(13) 0.02275(11) 0.01449(11) -0.00055(9) -0.00653(10) -0.00440(11) 
 
_geom_special_details 
; 
 All esds (except the esd in the dihedral angle between two l.s. planes) 
 are estimated using the full covariance matrix.  The cell esds are taken 
 into account individually in the estimation of esds in distances, angles 
 and torsion angles; correlations between esds in cell parameters are only 
 used when they are defined by crystal symmetry.  An approximate (isotropic) 
 treatment of cell esds is used for estimating esds involving l.s. planes. 
; 
 
loop_ 
 _geom_bond_atom_site_label_1 
 _geom_bond_atom_site_label_2 
 _geom_bond_distance 
 _geom_bond_site_symmetry_2 
 _geom_bond_publ_flag 
C1 O1 1.456(2) . ? 
C1 C10 1.508(3) . ? 
C1 C2 1.526(3) . ? 
C1 H1 1.0000 . ? 
C2 C3 1.522(3) . ? 
C2 Se1 1.9708(19) . ? 
C2 H2 1.0000 . ? 
C3 C4 1.506(3) . ? 
C3 H3A 0.9900 . ? 
C3 H3B 0.9900 . ? 
C4 C9 1.388(3) . ? 
C4 C5 1.390(3) . ? 
C5 C6 1.387(3) . ? 
C5 H5 0.9500 . ? 
C6 C7 1.383(3) . ? 
C6 H6 0.9500 . ? 
C7 C8 1.386(3) . ? 
C7 H7 0.9500 . ? 
C8 C9 1.393(3) . ? 
C8 H8 0.9500 . ? 
C9 O1 1.374(3) . ? 
C10 C15 1.385(3) . ? 
C10 C11 1.396(3) . ? 
C11 C12 1.376(3) . ? 
C11 H11 0.9500 . ? 
C12 C13 1.379(3) . ? 
C12 H12 0.9500 . ? 
C13 C14 1.380(3) . ? 
C13 Br1 1.903(2) . ? 
C14 C15 1.392(3) . ? 
C14 H14 0.9500 . ? 
C15 H15 0.9500 . ? 
C16 C21 1.378(3) . ? 
C16 C17 1.393(3) . ? 
C16 Se1 1.921(2) . ? 
C17 C18 1.386(3) . ? 
C17 H17 0.9500 . ? 
C18 C19 1.386(3) . ? 
C18 H18 0.9500 . ? 
C19 O2 1.366(3) . ? 
C19 C20 1.387(3) . ? 
C20 C21 1.382(3) . ? 
C20 H20 0.9500 . ? 
C21 H21 0.9500 . ? 
C22 O2 1.434(3) . ? 
C22 H22A 0.9800 . ? 
C22 H22B 0.9800 . ? 
C22 H22C 0.9800 . ? 
 
loop_ 
 _geom_angle_atom_site_label_1 
 _geom_angle_atom_site_label_2 
 _geom_angle_atom_site_label_3 
 _geom_angle 
 _geom_angle_site_symmetry_1 
 _geom_angle_site_symmetry_3 
 _geom_angle_publ_flag 
O1 C1 C10 103.96(16) . . ? 
O1 C1 C2 110.29(17) . . ? 
C10 C1 C2 115.27(17) . . ? 
O1 C1 H1 109.0 . . ? 
C10 C1 H1 109.0 . . ? 
C2 C1 H1 109.0 . . ? 
C3 C2 C1 109.82(17) . . ? 
C3 C2 Se1 105.70(14) . . ? 
C1 C2 Se1 112.23(14) . . ? 
C3 C2 H2 109.7 . . ? 
C1 C2 H2 109.7 . . ? 
Se1 C2 H2 109.7 . . ? 
C4 C3 C2 111.08(17) . . ? 
C4 C3 H3A 109.4 . . ? 
C2 C3 H3A 109.4 . . ? 
C4 C3 H3B 109.4 . . ? 
C2 C3 H3B 109.4 . . ? 
H3A C3 H3B 108.0 . . ? 
C9 C4 C5 117.9(2) . . ? 
C9 C4 C3 120.20(19) . . ? 
C5 C4 C3 121.87(19) . . ? 
C6 C5 C4 121.5(2) . . ? 
C6 C5 H5 119.2 . . ? 
C4 C5 H5 119.2 . . ? 
C7 C6 C5 119.4(2) . . ? 
C7 C6 H6 120.3 . . ? 
C5 C6 H6 120.3 . . ? 
C6 C7 C8 120.4(2) . . ? 
C6 C7 H7 119.8 . . ? 
C8 C7 H7 119.8 . . ? 
C7 C8 C9 119.2(2) . . ? 
C7 C8 H8 120.4 . . ? 
C9 C8 H8 120.4 . . ? 
O1 C9 C4 122.86(19) . . ? 
O1 C9 C8 115.66(19) . . ? 
C4 C9 C8 121.4(2) . . ? 
C15 C10 C11 118.6(2) . . ? 
C15 C10 C1 121.35(19) . . ? 
C11 C10 C1 120.06(19) . . ? 
C12 C11 C10 121.3(2) . . ? 
C12 C11 H11 119.3 . . ? 
C10 C11 H11 119.3 . . ? 
C11 C12 C13 118.8(2) . . ? 
C11 C12 H12 120.6 . . ? 
C13 C12 H12 120.6 . . ? 
C12 C13 C14 121.8(2) . . ? 
C12 C13 Br1 118.94(17) . . ? 
C14 C13 Br1 119.28(16) . . ? 
C13 C14 C15 118.6(2) . . ? 
C13 C14 H14 120.7 . . ? 
C15 C14 H14 120.7 . . ? 
C10 C15 C14 120.9(2) . . ? 
C10 C15 H15 119.5 . . ? 
C14 C15 H15 119.5 . . ? 
C21 C16 C17 119.0(2) . . ? 
C21 C16 Se1 118.59(16) . . ? 
C17 C16 Se1 122.41(17) . . ? 
C18 C17 C16 120.0(2) . . ? 
C18 C17 H17 120.0 . . ? 
C16 C17 H17 120.0 . . ? 
C19 C18 C17 120.4(2) . . ? 
C19 C18 H18 119.8 . . ? 
C17 C18 H18 119.8 . . ? 
O2 C19 C18 116.05(19) . . ? 
O2 C19 C20 124.4(2) . . ? 
C18 C19 C20 119.6(2) . . ? 
C21 C20 C19 119.6(2) . . ? 
C21 C20 H20 120.2 . . ? 
C19 C20 H20 120.2 . . ? 
C16 C21 C20 121.4(2) . . ? 
C16 C21 H21 119.3 . . ? 
C20 C21 H21 119.3 . . ? 
O2 C22 H22A 109.5 . . ? 
O2 C22 H22B 109.5 . . ? 
H22A C22 H22B 109.5 . . ? 
O2 C22 H22C 109.5 . . ? 
H22A C22 H22C 109.5 . . ? 
H22B C22 H22C 109.5 . . ? 
C9 O1 C1 118.24(15) . . ? 
C19 O2 C22 116.69(17) . . ? 
C16 Se1 C2 101.95(9) . . ? 
 
loop_ 
 _geom_torsion_atom_site_label_1 
 _geom_torsion_atom_site_label_2 
 _geom_torsion_atom_site_label_3 
 _geom_torsion_atom_site_label_4 
 _geom_torsion 
 _geom_torsion_site_symmetry_1 
 _geom_torsion_site_symmetry_2 
 _geom_torsion_site_symmetry_3 
 _geom_torsion_site_symmetry_4 
 _geom_torsion_publ_flag 
O1 C1 C2 C3 -59.1(2) . . . . ? 
C10 C1 C2 C3 -176.38(18) . . . . ? 
O1 C1 C2 Se1 -176.33(13) . . . . ? 
C10 C1 C2 Se1 66.4(2) . . . . ? 
C1 C2 C3 C4 48.8(2) . . . . ? 
Se1 C2 C3 C4 170.08(15) . . . . ? 
C2 C3 C4 C9 -22.5(3) . . . . ? 
C2 C3 C4 C5 157.5(2) . . . . ? 
C9 C4 C5 C6 -1.4(3) . . . . ? 
C3 C4 C5 C6 178.6(2) . . . . ? 
C4 C5 C6 C7 0.0(4) . . . . ? 
C5 C6 C7 C8 1.3(4) . . . . ? 
C6 C7 C8 C9 -1.1(4) . . . . ? 
C5 C4 C9 O1 -175.6(2) . . . . ? 
C3 C4 C9 O1 4.4(3) . . . . ? 
C5 C4 C9 C8 1.6(3) . . . . ? 
C3 C4 C9 C8 -178.4(2) . . . . ? 
C7 C8 C9 O1 177.0(2) . . . . ? 
C7 C8 C9 C4 -0.3(3) . . . . ? 
O1 C1 C10 C15 109.2(2) . . . . ? 
C2 C1 C10 C15 -130.0(2) . . . . ? 
O1 C1 C10 C11 -68.6(2) . . . . ? 
C2 C1 C10 C11 52.2(3) . . . . ? 
C15 C10 C11 C12 1.3(3) . . . . ? 
C1 C10 C11 C12 179.1(2) . . . . ? 
C10 C11 C12 C13 -0.7(3) . . . . ? 
C11 C12 C13 C14 -0.4(3) . . . . ? 
C11 C12 C13 Br1 179.20(17) . . . . ? 
C12 C13 C14 C15 0.8(3) . . . . ? 
Br1 C13 C14 C15 -178.70(16) . . . . ? 
C11 C10 C15 C14 -0.8(3) . . . . ? 
C1 C10 C15 C14 -178.5(2) . . . . ? 
C13 C14 C15 C10 -0.3(3) . . . . ? 
C21 C16 C17 C18 -1.1(3) . . . . ? 
Se1 C16 C17 C18 179.46(16) . . . . ? 
C16 C17 C18 C19 0.0(3) . . . . ? 
C17 C18 C19 O2 -179.10(19) . . . . ? 
C17 C18 C19 C20 1.6(3) . . . . ? 
O2 C19 C20 C21 178.7(2) . . . . ? 
C18 C19 C20 C21 -2.1(3) . . . . ? 
C17 C16 C21 C20 0.7(3) . . . . ? 
Se1 C16 C21 C20 -179.91(18) . . . . ? 
C19 C20 C21 C16 0.9(3) . . . . ? 
C4 C9 O1 C1 -14.7(3) . . . . ? 
C8 C9 O1 C1 168.00(19) . . . . ? 
C10 C1 O1 C9 166.09(17) . . . . ? 
C2 C1 O1 C9 42.0(2) . . . . ? 
C18 C19 O2 C22 179.51(18) . . . . ? 
C20 C19 O2 C22 -1.2(3) . . . . ? 
C21 C16 Se1 C2 110.36(17) . . . . ? 
C17 C16 Se1 C2 -70.23(18) . . . . ? 
C3 C2 Se1 C16 163.65(14) . . . . ? 
C1 C2 Se1 C16 -76.66(16) . . . . ? 
 
_diffrn_measured_fraction_theta_max    0.999 
_diffrn_reflns_theta_full              27.16 
_diffrn_measured_fraction_theta_full   0.999 
_refine_diff_density_max    0.366 
_refine_diff_density_min   -0.296 
_refine_diff_density_rms    0.055 
